# Supplementary material for: DNA Repair-related Gene Signature In Predicting Prognosis Of Colorectal Cancer Patients
Source: Research Square preprint supplement (doi:10.21203/rs.3.rs-143768/v1), 2021-01-15
Supplement: Supplementary file 1 [file 6c172020efc4607ad3e9f9f4.docx]

**Table 2. C-index for DRGS risk compared with Oncotype DX**

| **Cohorts** | **DNA-repair Risk** | | **Oncotype DX colon** | |
| --- | --- | --- | --- | --- |
| **C-index** | **95% CI** | **C-index** | **95% CI** |
| Training cohort | 0.78 | 0.69 - 0.86 | 0.60 | 0.52 - 0.68 |
| Validation-1 cohort | 0.65 | 0.51 - 0.79 | 0.51 | 0.37 - 0.65 |
| Validation-2 cohort | 0.66 | 0.55 - 0.76 | 0.62 | 0.53 - 0.70 |
